1 **Title**

2 **Phylogenetic distribution and expression pattern analyses identified a divergent basal body**  
3 **assembly protein involved in land plant spermatogenesis**

4

5 Shizuka Koshimizu<sup>1,†</sup>, Naoki Minamino<sup>2,†</sup>, Tomoaki Nishiyama<sup>3</sup>, Emiko Yoro<sup>4</sup>, Kazuo Ebine<sup>2,5</sup>, Keiko  
6 Sakakibara<sup>4</sup>, Takashi Ueda<sup>2,5,\*</sup>, and Kentaro Yano<sup>1,\*</sup>

7 † These authors contributed equally

8 \* Corresponding authors

9

10 <sup>1</sup> School of Agriculture, Meiji University, Kawasaki 214-8571, Japan

11 <sup>2</sup> Division of Cellular Dynamics, National Institute for Basic Biology, Okazaki 444-8585, Japan

12 <sup>3</sup> Research Center for Experimental Modeling of Human Disease, Kanazawa University, Kanazawa  
13 920-0934, Japan

14 <sup>4</sup> Department of Life Science, Rikkyo University, Tokyo 171-8501, Japan

15 <sup>5</sup> Department of Basic Biology, SOKENDAI (The Graduate University for Advanced Studies),  
16 Okazaki 444-8585, Japan

17

18 E-mail addresses of corresponding authors

19 Kentaro Yano : [kyano@meiji.ac.jp](mailto:kyano@meiji.ac.jp)

20 Takashi Ueda : [tueda@nibb.ac.jp](mailto:tueda@nibb.ac.jp)

21

## 22 **Abstract**

23 Oogamy is a form of sexual reproduction and evolved independently in animals, fungi, and plants. In  
24 streptophyte plants, Charophyceae, Coleochaetophyceae, bryophytes, lycophytes, ferns  
25 (monilophytes), and some gymnosperms (Cycads and Ginkgo) utilize spermatozooids as the male  
26 gamete. Plant spermatozooids commonly possess characteristic structures such as the spline, which  
27 consists of a microtubule array, the multilayered structure (MLS) in which the uppermost layer is  
28 continuum of the spline, and multiple flagella. However, the molecular mechanisms underpinning  
29 plant spermatogenesis remain to be elucidated. To identify the genes involved in plant  
30 spermatogenesis, we performed computational analyses and successfully found deeply divergent  
31 *BLD10s* by combining multiple methods and omics-data. We then validated the functions of candidate  
32 genes in the liverwort *Marchantia polymorpha* and the moss *Physcomitrium patens* and found that  
33 *MpBLD10* and *PpBLD10* are required for normal basal body and flagella formation. *Mpblld10* mutants  
34 exhibited defects in remodeling of the cytoplasm and nucleus during spermatozoid formation, thus  
35 *MpBLD10* should be involved in chromatin reorganization and elimination of the cytoplasm during  
36 spermiogenesis. Streptophyte BLD10s are orthologous to BLD10/CEP135 family proteins, which  
37 function in basal body assembly, but we found that BLD10s evolved especially fast in land plants and  
38 *MpBLD10* might obtain additional functions in spermatozoid formation through the fast molecular  
39 evolution. This study provides a successful example of combinatorial study from evolutionary and  
40 molecular genetic perspectives that elucidated a function of the key protein of the basal body  
41 formation that fast evolved in land plants.

42

## 43 **Introduction**

44 Oogamy is a form of sexual reproduction using female and male gametes. The female gamete (egg  
45 cell) is non-motile and larger than the male gamete, whereas male gametes (sperm) are motile and  
46 smaller than female gametes. Oogamy evolved independently in animals, fungi, and plants (Spratt  
47 1971; Simpson 2018), and it is a big question what genes drove evolution to oogamy, i.e., sperm  
48 production.

49 In streptophyte plants, sexual reproduction in Charophyceae, Coleochaetophyceae, and land  
50 plants are via oogamy. Among these organisms, Charophyceae, Coleochaetophyceae, bryophytes,  
51 lycophytes, ferns (monilophytes), and some gymnosperms (cycads and ginkgo) utilize spermatozooids  
52 as the male gamete. Oogamy in streptophyte plants is presumed to have originated from a single  
53 ancestor, then flagella of spermatozooids were lost independently in angiosperms, gymnosperms (in the  
54 common ancestor of cupressophytes, gnetophytes and Pinaceae), and Zygnematophyceae (Hodges et  
55 al. 2012). Plant spermatozooids commonly possess characteristic structures such as the spline, which  
56 consists of a microtubule array, the multilayered structure (MLS) in which the uppermost layer is a  
57 continuum of the spline and basal bodies are located on it, and multiple flagella. For decades, these  
58 structural features of spermatozooids have been investigated mainly by transmission electron

59 microscopy (Norstog 1967; Carothers and Kreitner 1968; Kreitner and Carothers 1976; Graham and  
60 McBride 1979; Carothers and Duckett 1980; Renzaglia et al. 1985; Renzaglia and Duckett 1987). As  
61 reviewed by Renzaglia and Garbary (2001), in the spermatozooids of Charophyceae, bryophytes, and  
62 ferns, after the MLS develops, the nucleus becomes compacted and helically elongated along the  
63 spline, during which a major part of the cytoplasm is eliminated. Unlike in these species, in  
64 gymnosperms, the nucleus is neither condensed nor elongated, and the cytoplasm is not eliminated.  
65 The number of flagella in a spermatozoid of bryophytes or lycophytes is two, but a spermatozoid of  
66 ferns forms 20 - 50 or more flagella. Gymnosperms spermatozooids possess 1,000 - 50,000 flagella.  
67 Although morphological studies have been well conducted, the molecular and genetic players in plant  
68 spermatogenesis remain to be identified.

69         Currently, in addition to angiosperms, the genome sequences of a variety of streptophytes  
70 have been determined by progress of sequencing technologies (Rensing et al. 2008; Banks et al. 2011;  
71 Bowman et al. 2017; Li et al. 2018; Nishiyama et al. 2018; Zhao et al. 2019; Li et al. 2020; Wang et  
72 al. 2020), and a vast amount of omics data such as transcriptome have been accumulating in an online  
73 database, the Sequence Read Archive (SRA; Leinonen et al. 2010). Banks et al. (2011) reported that,  
74 after gene clustering, 32 of 137 ‘angiospermLoss’ groups (defined as present in at least two of the  
75 following: *Chlamydomonas* [*Chlamydomonas reinhardtii*], *Physcomitrella* [*Physcomitrium patens*],  
76 and *Selaginella* [*Selaginella moellendorffii*] but not in 15 angiosperms) harbored genes exhibiting  
77 similarity to flagella or basal body-related genes, consistent with the presence of flagellated cells in  
78 the three organisms. We envisioned that combining the phylogenetic distribution and expression data  
79 would yield a more specific set that could test their function using molecular genetic methods. We  
80 selected candidate genes specifically expressed in male reproductive tissues of *Marchantia*  
81 (*Marchantia polymorpha*) and *Physcomitrella* but excluded genes apparently present in  
82 *Chlamydomonas* to obtain a set that is worth investigating for the function in plant spermatogenesis.  
83 The functions of the candidate genes were examined in the liverwort *Marchantia polymorpha* and the  
84 moss *Physcomitrium* [*Physcomitrella*] *patens* (Rensing et al. 2020), for which molecular genetic  
85 techniques have been established (Schaefer 1997; Nishiyama et al. 2000; Ishizaki et al. 2008; Kubota  
86 et al. 2013). Loss-of-function mutants of the candidates MpBLD10 and PpBLD10 exhibited defects in  
87 basal body and flagella formation during spermatogenesis, suggesting that these genes are required for  
88 normal basal body and flagella formation. BLD10s were found to be putative orthologs of BLD10 in  
89 *Chlamydomonas reinhardtii* (CrBLD10), the product is required for assembly of the basal body.  
90 However, BLD10s evolved fast in the land plant lineage, and loss-of-function mutations in MpBLD10  
91 and PpBLD10 resulted in different phenotypes in the liverwort and moss, which were also distinct  
92 from the phenotype in the chlorophyte Crbld10 mutant. Defects in reorganizing the cytoplasm and  
93 nucleus during spermatozoid formation in Mpblld10 mutants suggested that MpBLD10 plays a role in  
94 spermatozoid formation, in addition to the basal body formation. Thus, we present the results of a  
95 successful combinatorial study encompassing phylogenetic distribution, gene expression, and

96 molecular genetics approaches, which unraveled that the function of the key component of the basal  
97 body formation is diverged during plant evolution.

98

## 99 **Results**

### 100 **Four protein family groups were selected as candidates involved in spermatogenesis**

101 To identify genes involved in plant spermatogenesis, we performed *in silico* analyses combining  
102 different methods as the first screening. The computational approach included the following steps  
103 (Supplementary Fig. S1).

104 Step 1, selection of protein family groups specific to plant species that produce  
105 spermatozooids. Because plant spermatozooids have structures distinct from animal sperm, such as a  
106 MLS contiguous with the spline, a spiral-shaped nucleus elongated along the spline, and multiple  
107 flagella, we hypothesized that the plant species producing spermatozooids would harbor specific genes  
108 not present in animals that are needed to form these distinctive structures. Therefore, we classified  
109 proteins of plants producing spermatozooids and animals into family groups using the OrthoFinder tool  
110 (Emms and Kelly 2019) and then selected protein family groups present only in the plants producing  
111 spermatozooids. In this step, we also used protein data for *Chlamydomonas*, a flagellate green alga that  
112 does not produce spermatozooids, so that we could remove known flagella proteins and unrelated  
113 proteins for spermatogenesis from among the candidates by exclusion of protein families contained in  
114 *Chlamydomonas*. Then, 938 protein family groups remained as primary candidates (Supplementary  
115 Fig. S1, Step 1).

116 Step 2, extraction of protein family groups composed by genes highly expressed during  
117 spermatogenesis. We expected that genes involved in spermatogenesis should be highly expressed  
118 during spermatogenesis. Based on RNA-seq data for tissues in the vegetative and male reproductive  
119 stages in *Marchantia* (Higo et al. 2016) and *Physcomitrella* (Koshimizu et al. 2018), we extracted  
120 genes exhibiting higher expression levels during male reproductive stages compared to vegetative  
121 stages. For families consisting of multiple genes, we selected as candidates those in which all  
122 members are highly expressed at the male reproductive stages as candidates. In this step, 165 groups  
123 were retained (Supplementary Fig. S1, Step 2).

124 Step 3, selection of protein family groups for which member proteins exhibit low BLAST  
125 similarities with animal and *Chlamydomonas* proteins. In Step 1, we excluded protein family groups  
126 shared between plants and animals or *Chlamydomonas*. In this step, we further eliminated protein  
127 family groups that include proteins highly similar to those of animals or *Chlamydomonas*. *Marchantia*  
128 proteins in the 165 protein family groups selected in Step 2 were used for the query, and we examined  
129 sequence similarities against animals and *Chlamydomonas* proteins by BLASTP searching (Altschul  
130 et al. 1997; Camacho et al. 2009). For exhaustive analysis, we used 'animals' and '*Chlamydomonas*  
131 *reinhardtii*' taxa of NCBI (NCBI Resource Coordinators 2018) nr datasets for the BLASTP search.  
132 When high sequence similarity to an animal or *Chlamydomonas* protein was detected (e-value < 0.001

133 or coverage > 10%), we excluded the protein family group. After this step, 31 groups remained  
134 (Supplementary Fig. S1, Step 3; and Supplementary Table S1).

135 Step 4, human check of the expression level data obtained in Step 2. From the *Marchantia*  
136 and *Physcomitrella* expression data used in Step 2, we selected seven genes exhibiting lower  
137 expression levels in the vegetative growth stage and substantial differences in expression levels  
138 between the vegetative and male reproductive stages. We then selected as candidates four protein  
139 family groups (Group-75, Group-89, Group-230, and Group-339) composed of seven proteins. It  
140 should be noted that although we could have initially selected genes exhibiting above-mentioned  
141 expression patterns, we preferred to use a strategy that narrows down the number of candidates after  
142 studying the functions of a broad range of proteins that could be involved in spermatogenesis  
143 (Supplementary Fig. S1, Step 4).

144

#### 145 **Two protein family groups were selected as final candidates for functional analysis**

146 Regarding Group-339, the function of a highly similar protein in *Arabidopsis*, AUG7 (AT5G17620.1),  
147 in delocalization of  $\gamma$ -tubulin in the mitotic spindle and phragmoplast was reported (Hotta et al. 2012).  
148 In spermatogenesis of bryophytes, centrioles serve as the microtubule organizing centers in the  
149 spindle for the final mitosis (Vaughn and Renzaglia 1998), in which  $\gamma$ -tubulin localizes to the  
150 centriolar centrosomes (Shimamura et al. 2004). These observations suggested that the proteins of  
151 Group-339 should play a role in  $\gamma$ -tubulin localization during spermatogenesis; thus, we reserved  
152 further functional analysis for Group-339. Group-75 included four proteins each of *Marchantia* and  
153 *Physcomitrella*. Because the deletion of all genes for four members would be technically difficult  
154 even in *Marchantia* or *Physcomitrella*, we also reserved this group for future analysis. The  
155 *Arabidopsis* protein highly similar to Group-89 is DUO3 (AT1G64570.1), which regulates male  
156 germline development, and is essential for sperm cell specification and fertilization (Brownfield et al.  
157 2009). It would be interesting to investigate the function of this protein in spermatogenesis in  
158 bryophytes. Group-230 proteins exhibited no similarity to *Arabidopsis* proteins, but it did exhibit a  
159 weak similarity to *Chlamydomonas* BLD10 (Cre10.g418250.t1.2, CrBLD10), a cartwheel protein  
160 essential for assembly of the basal body that functions as the origin of flagella (Matsuura et al. 2004;  
161 Hiraki et al. 2007). In Phytozome ver. 5, which the analysis by Banks et al. (2011) was based on, the  
162 member of Group-230, *Selaginella* SELMODRAFT\_427424 and PHYPADRAFT\_69693 (v1.1, older  
163 model; same locus as Pp3c9\_9040V3.2, but not the same exon-intron structure prediction), were  
164 placed in the same group with CrBLD10. However, the similarity was so subtle that the relation was  
165 not detected in Step 3. Current Phytozome ver. 12 “Gene Ancestry” for the viridiplantae places the  
166 *Physcomitrella* and *Marchantia* to different groups containing only mosses and *Marchantia*,  
167 respectively. No description on the encoding gene in *Marchantia* has been made, and the  
168 corresponding gene is annotated as a ‘structural maintenance of chromosomes smc family member’,  
169 with no publications reporting results of functional analyses in *Physcomitrella*. Thus, we decided to

170 conduct further functional analyses for Group-89 and Group-230 consisting of one member each in  
171 Marchantia, particularly focusing our interest on spermatogenesis (Supplementary Fig. S1, Step 5).  
172

### 173 **Mp*bl*d10 mutants are defective in spermatozoid formation**

174 To analyze the roles of these two genes, we generated knock-out lines by genome editing using the  
175 CRISPR/Cas9 system (Ran et al. 2013; Sugano et al. 2018). No mutants were obtained for the  
176 *Mapoly0029s0108* gene (Group-89). For the *Mapoly0001s0460* gene (Group-230), the guide-RNA  
177 sequence was designed to target the first exon (Fig. 1A), and two independent lines harboring  
178 frameshift mutations were obtained (Fig. 1A and Supplementary Fig. S2A). Hereinafter, we refer to  
179 Group-230 family proteins as BLD10 because the phenotype and sequence analyses suggested an  
180 orthologous relationship to CrBLD10. The mutants were designated *Mpbl*d10-1 and *Mpbl*d10-2.  
181 These mutations did not markedly affect vegetative growth of the thalli (Supplementary Fig. S2B) and  
182 formation of antheridiophores (Supplementary Fig. S2C-S2E). However, moving spermatozoids of the  
183 mutants were rarely observed for the mutants (Supplementary Movie 1-3). Intriguingly, cytoplasm  
184 elimination, nuclear elongation, and flagella formation were incomplete in the mutant spermatozoids  
185 compared with wild-type spermatozoids (Fig. 1B-1E). Immunostaining of centrin and acetylated  
186 tubulin (ac-tubulin) in spermatids was performed to observe basal bodies and the axoneme in the  
187 flagella (Fig. 1F-1I, Higo et al. 2018). Filaments of ac-tubulin were detected in a subpopulation of  
188 *Mpbl*d10-spermatids, but spermatids with no detectable ac-tubulin were also observed. In spermatids  
189 positive for the ac-tubulin signal, short or coiled filaments in the cell bodies were frequently noted  
190 (Fig. 1G and 1H). The puncta signals of centrin exhibiting an abnormal size were sometimes observed  
191 in the mutant (Fig. 1I). These results suggested that *MpBLD10* plays a crucial role in spermatozoid  
192 formation in Marchantia.

193 To examine the effect of the mutation in *MpBLD10* at an ultrastructural level, we conducted  
194 a transmission electron microscopy (TEM) analysis of spermatids and spermatozoids of the *Mpbl*d10-  
195 1 mutant. The flagella of wild-type spermatids contained an axoneme comprising two central  
196 microtubules and surrounding nine doublet microtubules (Fig. 2A). In the *Mpbl*d10-1 mutant,  
197 however, a major population of spermatids did not harbor flagella, and the flagella formed in a  
198 subpopulation of spermatids exhibited a disordered axoneme structure (Fig. 2E). No structural  
199 abnormalities were detected in the *Mpbl*d10-1 mutant MLS, a structure unique to plants that is  
200 attached to the anterior mitochondrion in spermatids and consists of the spline, which is the  
201 uppermost stratum containing arrayed microtubules, and a lower strata with high electron densities,  
202 namely, the lamellar strip (Fig. 2B and 2F). We also observed wild-type basal bodies, which contain  
203 nine triplet microtubules and are attached to the spline of the MLS (Fig 2C and 2D). In the *Mpbl*d10-1  
204 mutant, the wild type-like basal bodies were only occasionally observed, and amorphous electron-  
205 dense regions were frequently observed instead of basal bodies (Fig. 2G and 2H). These results  
206 strongly suggested that *MpBLD10* is required for correct assembly of the basal body and flagella

207 during spermatogenesis. Furthermore, we observed that the *Mpblld10-1* spermatozooids also exhibited a  
208 defect in chromatin compaction in the nucleus (Fig. 2I and 2J). Thus, *MpBLD10* might also be  
209 involved in chromatin organization during spermiogenesis in *Marchantia*.

210

### 211 **PpBLD10 is required for formation of basal bodies and flagella**

212 To further examine the functions of the Group-230 proteins (BLD10s) in bryophytes, we analyzed the  
213 ortholog of *MpBLD10* in *Physcomitrella*, the model of moss readily amenable to gene targeting and  
214 genome editing. The Group-230 in *Physcomitrella* consists of only *Pp3c9\_9040V3.2* (*PpBLD10*). We  
215 generated knock-out mutants of this gene using the CRISPR-Cas9 system. *Ppblld10-22*, which has an  
216 11-bp deletion in the first exon, and *Ppblld10-30*, which has an approximately 10-kbp deletion  
217 between exon 1 and exon 29 of the transcript XM\_024529611.1, were used in further analyses  
218 (Supplementary Fig. S3). Although these mutants did not exhibit any marked defects in protonemata,  
219 gametophores, and gametangia (Supplementary Fig. S4), spermatozooids of these mutants were not  
220 motile; no moving mutant spermatozooids were observed (Supplementary Movie 4-6). Spermatids  
221 lacking the signal or with coiled filaments were observed in the mutants immunostained for ac-tubulin  
222 (Supplementary Fig. S5C-S5F), indicating that the mutants are defective in flagella formation, similar  
223 to *Marchantia*. No marked defects in elimination of the cytoplasm and nuclear elongation of the  
224 mutants were observed (Supplementary Fig. S6A-S6C).

225 In the TEM analysis of spermatids and spermatozooids, no axoneme structure was observed  
226 in most of the spermatids in *Ppblld10-30* (Supplementary Fig. S7A and S7C), and amorphous electron-  
227 dense regions were observed instead of basal bodies (Supplementary Fig. S7B and S7D). With regard  
228 to the MLS, no marked defects were observed in the mutant, similar to the *Mpblld10-1* mutant  
229 (Supplementary Fig. S7B and S7D). In contrast to the *Mpblld10-1*, no defect in chromatin compaction  
230 in the nucleus was observed in *Ppblld10-30* (Supplementary Fig. S7E and S7F). These results suggest  
231 that PpBLD10 functions in basal body- and flagella assembly, but the requirement for PpBLD10 in  
232 chromatin compaction and nuclear formation differs from the case in *Marchantia*.

233

### 234 **MpBLD10 and PpBLD10 localize in basal bodies during flagella formation**

235 We next examined the subcellular localization of MpBLD10. We generated a transgenic line of  
236 *Marchantia* expressing mCitrine-fused MpBLD10 driven by its own promoter in *Mpblld10-1*.  
237 Expression of mCitrine-MpBLD10 restored the defects in spermatozoid formation and motility in the  
238 mutant, indicating that this chimeric protein retains the authentic function (Supplementary Movie 7).  
239 In this transgenic line, we traced spermiogenesis according to developmental stage as previously  
240 defined (Minamino et al. 2021). In stage 0 spermatids, mCitrine-MpBLD10 was observed as two  
241 closely aligned rod-like structures (Fig. 3A). In stage 1 spermatids, mCitrine-positive structures were  
242 located at the base of the flagella (Fig. 3B). In stage 2, the mCitrine-MpBLD10 signal became weak,  
243 then ultimately disappeared in subsequent stages (Fig. 3C-3F). To verify the nature of these structures,

244 we performed co-immunostaining with centrin and ac-tubulin. As shown in Fig. 3G, mCitrine-  
245 MpBLD10 was localized in close association with centrin at the proximal side of the flagella (Fig.  
246 3G). These results suggest that MpBLD10 localize in the basal body during flagella formation and is  
247 then degraded after flagella formation.

248 The localization of PpBLD10 in *Physcomitrella* was examined using Citrine knock-in lines  
249 (Supplementary Fig. S3). Spermiogenesis was observed according to the developmental stages  
250 defined for *Marchantia* (Minamino et al. 2021) (Supplementary Fig. S8A-S8E), but in *Physcomitrella*,  
251 flagella formation was slower than in *Marchantia* and began when the nuclear shape was spindle-like;  
252 thus, stages 0 and 1 as defined for *Marchantia* are indistinguishable in *Physcomitrella*. PpBLD10-  
253 Citrine signals were observed in stage 0-1 and stage 2 but disappeared in subsequent stages, as in  
254 *Marchantia* (Supplementary Fig. S8A-S8E). In stage 0-1, the PpBLD10-Citrine was observed as  
255 puncta (Supplementary Fig. S8A); in stage 2, the signal was detected in a wider region of the basal  
256 part of the flagella as compared with stage 0-1 (Supplementary Fig. S8B and S8F). The positional  
257 relationship between PpBLD10-Citrine and centrin in *Physcomitrella* could not be observed because  
258 the anti-centrin antibody did not immunostain *Physcomitrella* spermatids (data not shown).

259

## 260 **BLD10s exist in streptophytes with flagella and evolved fast in land plants**

261 CrBLD10, to which MpBLD10 and PpBLD10 exhibit weak similarity, is an ortholog of *Homo*  
262 *sapiens* CEP135 (HsCEP135) (Carvalho-Santos et al. 2010), which plays a role in early basal  
263 body/centriole biogenesis (Kleylein-Sohn et al. 2007). To obtain information on BLD10 proteins in  
264 the streptophyte lineage and to assess their orthology to the BLD10/CEP135 family, we searched the  
265 genome, transcript, and protein sequences of species ranging from streptophyte algae to angiosperms  
266 (angiosperms: *Arabidopsis thaliana* and *Oryza sativa*; gnetophytes: *Gnetum montanum*; Pinaceae:  
267 *Picea abies* and *Pinus taeda*; Ginkgo: *Ginkgo biloba*; monilophytes: *Salvinia cucullata* and *Azolla*  
268 *filiculoides*; lycophytes: *Selaginella moellendorffii*; bryophytes: *Anthoceros punctatus*;  
269 Zygnematophyceae: *Penium margaritaceum*, *Mesotaenium endlicherianum*, and *Spirogloea*  
270 *muscolola*; Coleochaetophyceae: *Coleochaete orbicularis*; Charophyceae: *Chara braunii*;  
271 Klebsormidiophyceae: *Klebsormidium nitens*; Mesostigmatophyceae: *Mesostigma viride*;  
272 Chlorokybophyceae: *Chlorokybus atmophyticus*). In *Arabidopsis*, *Oryza*, *Gnetum*, *Picea*, *Pinus*,  
273 *Penium*, *Mesotaenium*, and *Spirogloea*, no hit sequences were obtained. Some of the hit sequences  
274 were reconstructed based on RNA-seq data and similarity to preliminary alignments. Finally, Ginkgo  
275 (GbBLD10a and GbBLD10b), *Salvinia* (Sacu\_v1.1\_s0007.g003760), *Azolla* (AfBLD), *Selaginella*  
276 (SmBLD10), *Anthoceros* (Apun\_evm.model.utg0000381.487.1), *Coleochaete* (GBSL01053926.1),  
277 *Chara* (CbBLD10), *Klebsormidium* (kfl00353\_0080\_v1.1), *Mesostigma* (MvBLD10), and  
278 *Chlorokybus* (Chrsp112S01623) were subjected to the alignment and phylogenetic analyses together  
279 with MpBLD10, PpBLD10, and CrBLD10 and non-plant BLD10/CEP135 family sequences from *H.*  
280 *sapiens* (HsCEP135), *Drosophila melanogaster* (DmBLD10), and *Tetrahymena thermophila*



281 (TtBLD10) as outgroup sequences (Fig. 4A and Supplementary Fig. S9). Additionally, we included  
282 the additional sequences *Adiantum capillus-veneris* MBC9850943.1, *Chlamydomonas eustigma*  
283 CEUSTIGMA\_g448.t1, and *Bombus impatiens* XP\_012244165.1 to stabilize the alignment and  
284 phylogenetic tree by dividing long branches. Here, among multiple potential isoforms, ref\_seq protein  
285 XP\_024385379.1 was used for the phylogenetic analysis because this isoform of PpBLD10 was well  
286 supported by RNA-seq data and fit the alignment better.

287 In the phylogenetic analysis, the green plant, streptophyte, and land plant genes formed a  
288 clade (Fig. 4A). Among land plants, the setaphytes (mosses + liverworts), and euphyllophytes formed  
289 a clade with low and high bootstrap supports, respectively. Outside of land plants,  
290 Coleochaetophyceae, Charophyceae, Klebsormidiophyceae, and Chlorokybophyceae branched in that  
291 order, with low bootstrap support. The branches of the land plants were longer than those of  
292 streptophyte algae (Fig. 4A). The molecular clock hypothesis was rejected between land plants and  
293 streptophyte algae, with *Chlamydomonas* as out-group by Tajima's relative rate test ( $p < 0.05$ ; Tajima  
294 1993), indicating an increase in the evolutionary rate of BLD10s in the land plant lineage. Upon  
295 application of a local clock model in PAML (Yang 2007) to the dataset for green plants, such that the  
296 branches of land plants after divergence from Coleochaetophyceae has different rates than all other  
297 branches, land plants had an approximately 2-fold higher evolutionary rate than green algae.

298

### 299 **Green plant BLD10s have a novel conserved domain close to the C-terminus**

300 **Functional regions were reported for CrBLD10 and HsCEP135:** a probably essential region for the  
301 function of CrBLD10 (residues 850 - 1,050; Hiraki et al. 2007), and three binding regions in  
302 HsCEP135 (microtubule-binding region, residues 1 - 190; CPAP-binding region, residues 50 - 460;  
303 hSAS-6-binding region, residues 416 - 1,140; Lin et al. 2013). Among streptophyte BLD10s, three  
304 conserved regions were identified (Fig. 4B and Supplementary Fig. S9). Region 1 does not seem to  
305 exist in *Selaginella*, because the N-terminal region is annotated as a separate protein in the ref\_seq  
306 annotation (XP\_024518287.1). The N-terminus of region 1 was not detected in either *Ginkgo* or  
307 *Adiantum*. As such, the level of conservation shown in Fig. 4B and Supplementary Fig. S9 is low, but  
308 region 1 is conserved in other streptophytes. The microtubule-binding region and the N-terminal half  
309 of the CPAP-binding region correspond to region 1 in streptophytes, but a large proportion of the  
310 BLD10/CEP135 family is so divergent that the conserved residues are rare (Supplementary Fig. S9).  
311 The C-terminal half of the CPAP-binding region was found to be mostly conserved among green algae  
312 including *Coleochaete*, but it was shortened in land plants. Region 2 includes the probably essential  
313 region of CrBLD10 and overlaps with the hSAS-6-binding region. Region 2 is a long and conserved,  
314 but a large deletion of 49 residues in the CrBLD10 essential region was found in MpBLD10  
315 (Supplementary Fig. S9). A review of RNA-seq data mapped to the region confirmed that the loss in  
316 MpBLD10 was not due to an annotation error skipping an exon. The 27 N-terminal residues are  
317 highly conserved in green plants. In streptophytes, region 3 is a 65-residues long highly conserved

318 region close to the C-terminus (Supplementary Fig. S9). Although some residues aligned, the  
319 distances to human, fly, and Tetrahymena were so large that the homology is obscure, and the  
320 alignment was unstable to additional insect sequences. Similarity to outside of land plants cannot be  
321 detected through PSI-BLAST (Altschul et al. 1997) with land plant sequences in NCBI, and no  
322 conserved domain was found in the conserved domain database (CDD; Lu et al. 2020). An  
323 examination of the alignment revealed that, CrBLD10 has region 3 starting with the signature  
324 (KR)XX(ED)LE and extending to (LVM)(LV)X(LI)(LM)(SA)(KR)(VL)(DE)X(DE)(RK) except Q  
325 rich block, thus it was judged to be homologous. Region 3 constitutes a novel conserved domain in  
326 green plants. A 3-amino acid (aa) deletion and lower conservation in the N-terminus of the region was  
327 noted in Klebsormidium. The intron-exon structure is fully supported by RNA-seq data.

328

### 329 **Discussion**

330 In this study, we established a pipeline that allows for efficient and rapid searches of protein family  
331 groups involved in plant spermatogenesis through a computational analysis of large omics datasets  
332 stored in publicly available online databases. Our *in silico* approach involves two primary steps: (i)  
333 selection of protein families specific to streptophytes that produce spermatozoid, and (ii) selection of  
334 protein families encoded by genes highly and predominantly expressed during spermatogenesis.  
335 Using this pipeline, we extracted seven genes from approximately 19,000 Marchantia genes belonging  
336 to four protein family groups (Group-75, Group-89, Group-230, and Group-339). Among these  
337 protein families, we conducted functional analyses of Group-89 and Group-230 in Marchantia. No  
338 Group-89 mutants were obtained, but we successfully generated loss-of-function mutants for Group-  
339 230 (BLD10s). We then found that the BLD10s play a crucial role in spermatogenesis in Marchantia  
340 and Physcomitrella, thus showing the effectiveness and accuracy of our computational selection  
341 approach. This method is applicable to the identification of genes involved in a variety of biological  
342 processes other than spermatogenesis using large omics datasets.

343 Most spermatozoids of the MpblD10 mutants did not have flagella. A few spermatozoids  
344 possessed short or coiled filaments within the cytoplasm (fig. 1G-1I), likely corresponding to  
345 incomplete flagella observed in a TEM image (fig. 2E). Similar results were observed in PpblD10  
346 mutants (Supplementary Fig. S5C-S5F and Supplementary Fig. S7C). Generally, flagella are observed  
347 outside the cell body in the early stages of spermatogenesis (Minamino et al. 2021), but the immature  
348 flagella-like structures remained inside the cell in the MpblD10 and PpblD10 mutants. In addition to  
349 this shared characteristic of Marchantia and Physcomitrella, the MpblD10 mutants also exhibited  
350 defective cytoplasm elimination, chromatin compaction, and nuclear elongation (Fig. 1C-1E and Fig.  
351 2J), which were not observed in the PpblD10 mutants (Supplementary Fig. S6B and S6C and  
352 Supplementary Fig. S7F). MpBLD10 and PpBLD10 were localized at the base of forming flagella in  
353 the early stages of spermiogenesis and disappeared after flagella formation was completed (Fig. 3A-  
354 3F and Supplementary Fig. S8A-S8E). This localization, together with the close association between

355 MpBLD10 and centrin at the base of the flagella (Fig. 3G), suggests that MpBLD10 and PpBLD10  
356 are basal body proteins that function in basal body assembly. MpBLD10 is likely also involved in  
357 chromatin reorganization during spermiogenesis. The additional effect of the *Mpblld10* mutation on  
358 phenotypes shared between *Mpblld10* and *Ppblld10* suggests that MpBLD10 plays an additional role  
359 during spermiogenesis and that the functions of MpBLD10 and PpBLD10 partially diverged during  
360 bryophyte evolution.

361 In the phylogenetic analysis, the branching order among streptophyte algae was congruent  
362 with an organism tree based on phylotranscriptomic analyses (Wickett et al. 2014; Puttick et al. 2018;  
363 Leebens-Mack et al. 2019) with low bootstrap support (Fig. 4A). Although the monophyly of land  
364 plant genes was supported by a high bootstrap value, among land plants, the tree was congruent with  
365 the phylogeny of organisms with low bootstrap supports, except for the position of the hornwort gene.  
366 The placement of hornworts sister to all other land plants has been observed at a low frequency in low  
367 copy number gene phylogenies of land plants (Li et al. 2020). Based on the congruence to the  
368 phylogeny, these streptophyte BLD10s are putative orthologs of CrBLD10 (fig. 4A). Flagellate  
369 species in streptophytes have BLD10; conversely, species without flagella (i.e., Zygnematophyceae,  
370 conifers/gnetophytes, and angiosperms) lost BLD10 (Fig. 5). BLD10/CEP135 family proteins  
371 function in assembly of the basal body/centriole, which is involved in cell division and serves as the  
372 basis of flagella/cilia in human (Kleylein-Sohn et al. 2007; Lin et al. 2013), fly (Mottier-Pavie and  
373 Megraw 2009; Carvalho-Santos et al. 2012), Tetrahymena (Bayless et al. 2012), and Chlamydomonas  
374 (Matsuura et al. 2004; Hiraki et al. 2007). MpBLD10 and PpBLD10 also play a role in basal body  
375 assembly, similar to other BLD10/CEP135 family proteins. In accordance with the differences in  
376 BLD10 sequences between land plants and Chlamydomonas, the mutant phenotypes differed from the  
377 mutants of other BLD10/CEP135 family proteins; basal bodies were completely lacking and flagella  
378 never observed in *Crblld10*, but incomplete basal bodies and flagella were formed in the *Mpblld10* and  
379 *Ppblld10* mutants. Although DmBLD10 remains after the development of sperms in fly (Mottier-Pavie  
380 and Megraw 2009), MpBLD10 and PpBLD10 disappeared, suggesting that MpBLD10 and PpBLD10  
381 are necessary only during flagella formation, and no longer needed after the formation of flagella. In  
382 addition, *Mpblld10* mutants exhibited defects in cytoplasmic reduction and nuclear elongation during  
383 spermiogenesis, and this phenotype was observed specifically in *Marchantia* but not in  
384 *Physcomitrella*. Changes in the role of basal body/centriole in the life cycle or environment of  
385 fertilization (free water, limited water, or pollination droplet) in land plants might have affected the  
386 evolutionary rate of BLD10s in land plants through positive selection or a relaxation of purifying  
387 selection, which cannot be discerned from the current data. Note that centrioles are not observed  
388 during cell division in land plants (Buschmann and Zachgo 2016) (Fig. 5). Despite *Klebsormidium*  
389 *nitens* NIES-2285 do not show flagellated cells under laboratory conditions, BLD10 expression is  
390 detected in RNA-seq data, implying their role in cell division rather than flagella formation. BLD10  
391 probably played a dual role in the flagella formation and cell division in the ancestral green algae and

392 then lost the role in cell division in land plants after other microtubule organization mechanisms for  
393 chromosome separation during cell division were established; thus, the protein has a sperm-specific  
394 function in bryophytes, lycophytes, and ferns. BLD10 gene was lost entirely in conifers/gnetophytes  
395 and angiosperms, consistent with the loss of flagellated sperm cells.

396 We successfully identified genes that function in plant spermatogenesis using an *in silico*  
397 analysis. Two identified proteins, MpBLD10 and PpBLD10, are basal body proteins that exhibit a  
398 higher evolutionary rate despite the importance of their role in assembly of the basal body during  
399 spermatogenesis. MpBLD10 possibly acquired a new role in spermatozooids formation—specifically,  
400 in cytoplasm elimination and nuclear elongation—through plant evolution. Notably, the relationship  
401 that streptophyte BLD10s are putative orthologs of BLD10 was not found in a simple run of  
402 OrthoFinder, and identified only after a more detailed analysis. The importance of gene loss in the  
403 evolution was recently documented in various fields/cases, and phylogenetic distribution of the gene  
404 involved in a particular trait coincides with the distribution of the trait (Glastad et al. 2011; Zhang et  
405 al. 2013; Lin et al. 2017; Griesmann et al. 2018; Sharma et al. 2018; Gluck-Thaler et al. 2020). In this  
406 analysis, we demonstrated that the process can be reversed; that is, a gene responsible for the trait can  
407 be identified by searching for a gene whose phylogenetic distribution coincides with the trait  
408 combined with the expression at the site the trait is observed. The results of this study thus highlight  
409 the power of combinatorial analyses with expression and multiple independent losses of traits and  
410 underlying genes during evolution.

411

## 412 **Materials and Methods**

### 413 ***In silico* screening**

414 Ortholog groups were predicted using OrthoFinder (v2.3.3, Emms and Kelly 2019) with the protein  
415 sequences of the species shown in Supplementary Table S2. For expression level quantification in  
416 *Marchantia* and *Physcomitrella*, transcripts per million (TPM) values were calculated using RSEM  
417 (v1.3.1, Li et al. 2011) with Bowtie2 (v2.3.5.1, Langmead et al. 2012) for RNA-seq data listed in  
418 Supplementary Table S3 using the reference transcriptome datasets listed in Supplementary Table S2.

419

### 420 **Sequence searching and reconstruction of gene models**

421 BLD10 proteins in the streptophytes were searched against the genome, transcript, and protein  
422 sequences using BLAST (v2.10.1+, Altschul et al. 1997; Camacho et al. 2009). In the protein datasets,  
423 BLASTP searching was performed using MpBLD10 against the species shown in Supplementary  
424 Table S2. Hit protein sequences are listed in Supplementary Table S4. The lengths of hit sequences in  
425 *Ginkgo* and *Chara* were <600 aa (full length of MpBLD10 is 1,123 aa). Because the close gene ids  
426 implied close positions in the genome, genomic locations were investigated. Gb\_13822 is at the 279  
427 Mb position on Chr12; Gb\_03087-Gb03089, Gb\_30854, and Gb\_30855 are close to the 630 Mb  
428 position on Chr12; Gb\_39501 is close to the 277 Mb position on Chr7. Two gene models on Chr12

429 were reconstructed based on mapping of RNAseq data (*GbBLD10a* and *GbBLD10b*), and no reads  
430 were found for Gb\_39501. In Chara, we constructed a presumptive transcript (*CbBLD10*) from the  
431 genome and RNA-seq data (Nishiyama et al. 2018). Azolla sequence Azfi\_s0013.g013382 had a  
432 deletion in the C-terminal region. The missed exons were supplied based on the RNA-seq data (Li et  
433 al. 2018), and a gene model (*AfBLD10*) was constructed. In Selaginella, the hit sequence  
434 SELMODRAFT\_427424 had three deletions and one insertion relative to most of the green plant  
435 BLD10s in the initial alignment. By investigating the genomic sequence with the preliminary  
436 alignment as a guide, a gene model more similar to the conserved consensus was constructed  
437 (*SmBLD10*), though the RNA-seq data of sperm-producing tissue in Selaginella were insufficient.  
438 Although SELMODRAFT\_427424 resides on scaffold\_90, another copy (allele) is present on  
439 scaffold\_104, but contained an assembly gap (stretch of Ns) and was not annotated. Further,  
440 transcriptome shotgun assemblies (TSA) were searched using TBLASTN at NCBI (NCBI Resource  
441 Coordinators 2018) with CrBLD10. Hit transcript sequences for *Mesostigma viride* and *Coleochaete*  
442 *orbicularis* were obtained (Supplementary Table S4). *Mesostigma* had split hits of the different  
443 contigs with reasonable similarity, presumably constituting the corresponding protein. The three  
444 contigs were mapped to scaffold\_80 between 197,517 and 234,765. Thus, a gene model encoding  
445 1744 residues (MvBLD10) was constructed for the region mostly based on RNA-seq mapping and a  
446 little guess work. The *Coleochaete orbicularis* contig appeared to contain a complete coding  
447 sequence. The reconstructed gene models are shown in Supplementary Data 1 and 2.

448

#### 449 **Method for reconstructing gene models based on RNA-seq data or alignment similarity**

450 Ginkgo, Azolla, Selaginella, Chara, and *Mesostigma* BLD10 sequences were reconstructed according  
451 to the following method. RNA-seq data were previously published or downloaded from SRA using  
452 fastq-dump (Supplementary Table S3). The RNA-seq data were mapped to a corresponding reference  
453 genome using hisat2 (v2.2.1; Kim et al. 2019). The mapped bam files were sorted according to the  
454 coordinates using samtools (Danecek et al. 2021) and then indexed. The reference sequence and  
455 annotations in gff files were loaded to JBrowse-1.15.4 (Buels et al. 2016) using prepare-reference and  
456 flatfile-to-json, respectively. The indexed bam files were loaded using add-bam-track. After preparing  
457 the data directory of JBrowse, the data were connected to Apollo-2.1.0 for manual editing. The gene  
458 model or bam read alignment was chosen for the new gene models and merged or extended in the user  
459 model editing pane. For the *Ginkgo biloba* reference, the bam file could not be indexed due to its large  
460 reference size (>512 Mb). Thus, the reference was cut to 500 Mb, and Chr12, at >500 Mb, were  
461 named as 'Chr12b' for subsequent processing. The records of bam files were screened for Chr7 at  
462 <500 Mb and Chr12, and records for Chr12 >500 Mb were placed to Chr12b, and positions were  
463 subtracted by 500 million. The reference genome gff was similarly edited. Thus, Chr7, Chr12 up to  
464 500 Mb, and Chr12 over 500 Mb were loaded to JBrowse and apollo2.

465

## 466 **Phylogenetic analyses**

467 The protein sequences HsCEP135 (ENSP00000257287), DmBLD10 (FBpp0075391), and TtBLD10  
468 (TTHERM\_01164140) were obtained via Ensembl (Yates et al. 2020), FlyBase (Larkin et al. 2020),  
469 and TGD (Stover et al. 2006), respectively. *Adiantum capillus-veneris* MBC9850943.1,  
470 *Chlamydomonas eustigma* CEUSTIGMA\_g448.t1, and *Bombus impatiens* XP\_012244165.1 were  
471 obtained from NCBI. Multiple sequence alignment was performed using MAFFT (Katoh and  
472 Standley 2013) with the accurate option E-INS-i in Jalview software (v2.10.5, Waterhouse et al.  
473 2009). The conservation level was calculated based on that used in the AMAS method for multiple  
474 sequence alignment analysis (Livingstone and Barton 1993) in Jalview. A phylogenetic tree was  
475 constructed based on the multiple alignment with complete deletion of gap sites using the maximum-  
476 likelihood method of MEGA X software (Kumar et al. 2018), with 1,000 bootstrap replicates. Jones-  
477 Taylor-Thornton (JTT) matrix-based model (Jones et al. 1992) with gamma-distribution among sites  
478 and subtree-pruning-regrafting - extensive (SPR level 5) were used for amino acid substitution model  
479 and heuristic methods. Protein regions used in the analyses are shown in Supplementary Fig. S9  
480 (orange boxes). Differences in branch length between land plants and green algae were compared  
481 using the local clock model in PAML4 (v4.9j; Yang 2007). Branches in land plants and the branch  
482 leading to land plants after divergence with Coleochaetophyceae were assigned category #1 in the  
483 comparison. JTT model was used for amino acid rate. Other parameters were the same as those of the  
484 ‘aaml.ctl’ file distributed with the software.

485

## 486 **Plant materials**

487 Male accession of *Marchantia*, Takaragaike-1 (Tak-1), was used for observing spermatogenesis in this  
488 study. Plants were grown on 1/2× Gamborg’s B5 medium containing 1.4% (w/v) agar at 22°C in  
489 continuous white light. Induction of sexual organ generation by far-red irradiation was performed as  
490 described previously (Chiyoda et al. 2008).

491 *Physcomitrella* Gransden ‘Cove-NIBB’ line (Nishiyama et al. 2000) was used as the wild  
492 type. *Physcomitrella* was cultured on BCDAT medium with 0.8% (w/v) agar at 25 °C under  
493 continuous light conditions for protonemata (Nishiyama et al. 2000). Protonemata were transplanted  
494 into sterile peat pots (Jiffy-7; Jiffy Products International AS) and cultured approximately one month  
495 at 25 °C in continuous light for gametophores. To obtain gametangia and sporophytes, the peat pots  
496 containing gametophores were incubated at 15 °C under short-day (8-h light and 16-h dark)  
497 conditions (Sakakibara et al. 2008).

498

## 499 **Transformation of *Marchantia***

500 To construct vectors for genome editing, target sequences were selected using CRISPR direct  
501 (<https://crispr.dbcls.jp/>) (Naito et al. 2015), and double-stranded oligonucleotides of the target  
502 sequences were inserted into the pMpGE\_En03 vector (Sugano et al. 2018). The resultant gRNA

503 cassettes were introduced into the pMpGE010 vector using Gateway LR Clonase II Enzyme Mix  
504 (Thermo Fisher Scientific). To express Citrine under regulation of the Mp*BLD10* promoter, 5 kb of  
505 the 5' flanking region of Mp*BLD10* with a SmaI site was introduced into the pENTR/D-TOPO vector  
506 (Invitrogen). The chimeric sequence was introduced into pMpGWB307 (Ishizaki et al. 2015) using  
507 Gateway LR Clonase II Enzyme Mix. To construct the mCitrine-Mp*BLD10* vector, a genomic  
508 fragment containing the coding region, intron, and 4 kb of the 3' flanking region of Mp*BLD10* was  
509 inserted into the SmaI site of the pENTR/D-TOPO vector containing *pro*Mp*BLD10* by using an In-  
510 Fusion HD cloning kit (Clontech). A silent mutation was introduced into the PAM site by inverse  
511 PCR. The CDS of monomeric Citrine was introduced into the SmaI site of the pENTR/D-TOPO  
512 vector containing the Mp*BLD10* genomic fragment by using an In-Fusion HD cloning kit (Clontech).  
513 The chimeric sequence was introduced into pMpGWB301 (Ishizaki et al. 2015) using Gateway LR  
514 Clonase II Enzyme Mix. The primer sequences are listed in Supplementary Table S5.

515 Transformation of *Marchantia* was performed according to previously described methods  
516 (Ishizaki et al. 2008; Kubota et al. 2013). Transgenic lines were selected with 10 mg l<sup>-1</sup> hygromycin B  
517 and 100 mg l<sup>-1</sup> cefotaxime for pMpGE010, and 0.5 μM chlorsulfuron and 100 mg l<sup>-1</sup> cefotaxime for  
518 pMpGWB301.

519

## 520 Transformation of *Physcomitrella*

521 To perform CRISPR-mediated mutagenesis, we designed oligodeoxynucleotides used as single-guide  
522 RNAs (sgRNAs) targeting Pp*BLD10* (Supplementary Fig. S3B) using CRISPRdirect  
523 (<https://crispr.dbcls.jp/>; last visited April, 2021). The annealed oligodeoxynucleotides were cloned into  
524 the BsaI site of pPpU6-sgRNA (LC494193) (Gu et al. 2020). To generate genome editing mutants,  
525 protoplasts were co-transformed with a total of 6 μg of circular DNAs divided as follows: 2 μg of  
526 pPpU6-Pp*BLD10*-sgRNA#1 or pPpU6-Pp*BLD10*-sgRNA#2, 2 μg of pAct-Cas9 (Collonnier et al.  
527 2017), and 2 μg of pBHRF (Schaefer et al. 2010). After transient hygromycin-resistance selection,  
528 transformants were recovered on a non-selective medium. To detect mutations, we amplified the  
529 targeting region by PCR using three sets of primers (Supplementary Table S5) and sequenced the  
530 fragments. To generate a Citrine knock-in line, the genomic sequence corresponding to intron 31-exon  
531 35 and the 3' flanking region of Pp*BLD10* were cloned into pCTRN-NPTII-2 plasmid (AB697058).  
532 The Citrine-fusion plasmid was amplified by PCR using the primers listed in Supplementary Table S5  
533 and transformed into protoplasts. Transformation for the generation of both loss-of-function mutants  
534 and Citrine knock-in lines were performed as previously described (Nishiyama et al. 2000). The  
535 Citrine knock-in lines were screened using DNA gel blot analysis to confirm single integrations.  
536 Genomic DNA (2 μg) was digested with EcoT22I, electrophoresed on 0.8% (w/v) SeaKem GTG  
537 agarose (Lonza), and transferred onto a Hybond N+ nylon membrane (GE Healthcare). Probe  
538 labelling, hybridization, and detection were performed using an AlkPhos direct labelling and detection  
539 system with CDP-Star (GE Healthcare). A PCR-amplified fragment of the 3' untranslated region of

540 Pp*BLD10* was used as a DNA probe.

541

## 542 **Microscopy**

543 To observe Marchantia spermatids, antheridia were fixed for 60 min with 4% (w/v) paraformaldehyde  
544 (PFA) in PME buffer (50 mM PIPES-KOH, 5 mM EGTA, and 1 mM MgSO<sub>4</sub> [pH 6.8]), and treated  
545 for 30 min with cell wall digestion buffer (1% [w/v] cellulase, 0.25% [w/v] pectolyase Y-23, 1% [w/v]  
546 BSA, 0.1% [w/v] NP-40, 1% glucose, and 1× cOmplete™ EDTA-free protease inhibitor cocktail  
547 [Roche Applied Science] in PME buffer). The samples were placed on a glass slide and then covered  
548 with a cover slip in PBS containing 0.1% (v/v) Hoechst33342 (Dojindo). For immunostaining of  
549 Marchantia spermatids, antheridia were fixed for 90 min with 4% (w/v) PFA in PME buffer and  
550 treated for 30 min with cell wall digestion buffer. Cells were then treated with permeabilization buffer  
551 (0.01% [v/v] Triton X-100 and 1% [w/v] BSA in PME buffer) for 10 min. After washing with PME  
552 buffer three times, cells were placed on a MAS-coated glass slide (Matsunami) and incubated for 30  
553 min at room temperature with blocking solution (1% [w/v] BSA in PBS buffer). After removal of  
554 blocking solution, the cells were incubated with primary antibody in PBS buffer at 4°C overnight.  
555 After washing with PBS buffer three times, the samples were incubated for 60 min at 37°C with the  
556 secondary antibody and 0.1% (v/v) Hoechst33342 in PBS buffer. After washing with PBS buffer three  
557 times, the slides were mounted using ProLong Diamond Antifade reagent (Thermo Fisher Scientific).  
558 Samples were observed under a confocal microscope (LSM780, Carl Zeiss) with an oil immersion  
559 lens (×63). For immunostaining of Physcomitrella spermatids, the same method was used with  
560 modifications. The duration of cell wall digesting buffer treatment was changed to 40 min. Samples  
561 were observed under a confocal microscope (LSM880, Carl Zeiss) with an oil immersion lens (×63).

562 For observation of Marchantia spermatozoids, freshly prepared spermatozoids in distilled  
563 water were observed under a dark-field microscope (Olympus) equipped with an ORCA-Flash4.0 V2  
564 camera (Hamamatsu Photonics). Physcomitrella spermatozoids were extracted by pressing the  
565 antheridia between a glass slide and a cover slip with a 0.03-mm spacer (Koshimizu et al. 2018) and  
566 observed under a dark-field microscope (BS-2040T, BioTools) equipped with a Michrome 5Pro  
567 camera (BioTools).

568 The obtained images were processed using ImageJ (National Institutes of Health) and  
569 Photoshop (Adobe Systems) software.

570

## 571 **Antibodies**

572 The monoclonal antibody against acetylated tubulin was purchased from Sigma-Aldrich (T7451) and  
573 used at 1/10000 dilution for immunostaining. The polyclonal antibody against centrin was described  
574 previously (Higo et al. 2018) and used at 1/5000 dilution for immunostaining. Alexa Fluor 488 plus  
575 goat anti-mouse IgG, Alexa Fluor 594 plus goat anti-rabbit IgG, and Alexa Fluor 680 goat anti-mouse  
576 IgG were purchased from Thermo Fisher Scientific and used at 1/1000 dilution for immunostaining.



577

## 578 **Transmission electron microscopy**

579 To observe spermatids, antheridia of *Marchantia* Tak-1, the *Mpbl10-1* mutant, *Physcomitrella* wild  
580 type, and *Ppbl10-30* were collected and fixed with 2% PFA and 2% glutaraldehyde (GA) in 0.05 M  
581 cacodylate buffer (pH 7.4) at 4°C overnight. The fixed samples were washed three times with 0.05 M  
582 cacodylate buffer for 30 min each and then post-fixed with 2% osmium tetroxide in 0.05 M  
583 cacodylate buffer at 4°C for 3 h. The samples were dehydrated in graded ethanol solutions (50% and  
584 70% ethanol for 30 min each at 4°C, 90% for 30 min at room temperature, four times with 100%  
585 ethanol for 30 min at room temperature, and 100% ethanol overnight at room temperature). The  
586 samples were infiltrated with propylene oxide (PO) twice for 30 min each and placed into a 50:50  
587 mixture of PO and resin (Quetol-651; Nisshin EM Co.) for 3 h. The samples were transferred to 100%  
588 resin and polymerized at 60°C for 48 h. To observe mature *Marchantia* spermatozooids, spermatozooids  
589 of Tak-1 and the *Mpbl10-1* mutant were collected in water, centrifuged at 5000×g for 3 min, and  
590 fixed with 2% PFA and 2% GA in 0.05M cacodylate buffer (pH 7.4) at 4°C overnight. The fixed  
591 samples were washed three times with 0.05 M cacodylate buffer for 30 min each and post-fixed with  
592 2% osmium tetroxide in 0.05 M cacodylate buffer at 4°C for 2 h. The samples were dehydrated in  
593 graded ethanol solutions (50% and 70% ethanol for 20 min each at 4°C, 90% for 20 min at room  
594 temperature, and four times with 100% ethanol for 20 min at room temperature). The samples were  
595 infiltrated with PO twice for 30 min each and placed into a 70:30 mixture of PO and resin (Quetol-  
596 651; Nisshin EM Co.) for 1 h, then the tube cap was opened, and PO was allowed to volatilize  
597 overnight. The samples were transferred to 100% resin and polymerized at 60°C for 48 h. The  
598 polymerized resins were ultra-thin-sectioned at 70 nm with a diamond knife using an ultramicrotome  
599 (Ultracut UCT; Leica) and the sections were mounted on copper grids. The sections were stained with  
600 2% uranyl acetate for 15 min at room temperature, washed with distilled water, and secondary-stained  
601 with lead stain solution (Sigma-Aldrich) for 3 min at room temperature. The grids were observed  
602 under a transmission electron microscope (JEM-1400Plus; JEOL Ltd.) at an acceleration voltage of  
603 100 kV. Digital images (3296×2472 pixels) were acquired using a CCD camera (EM-14830RUBY2;  
604 JEOL Ltd.).

605

606

## 607 **Acknowledgements**

608 We thank N. Kawakami (Meiji Univ.), K. Yoshimoto (Meiji Univ.), and H. Kaku (Meiji Univ.) for  
609 support in environment of experiments, F. Nogué (INRA), Y. Horiuchi (NIBB), and M. Hasebe  
610 (NIBB) for providing plasmids for genome editing of *Physcomitrella*. We also thank T. Kimura  
611 (Hokkaido Univ.) and M. Shimamura (Hiroshima Univ.) for anti-centrin antibody and H. Mano  
612 (NIBB) for lending electron microscopy instrumentation and for general advice. Computations were  
613 partially performed on the NIG supercomputer at the ROIS National Institute of Genetics and the Data

614 Integration and Analysis Facility at the National Institute for Basic Biology. Electron microscopy  
615 analyses were partly supported by the EM facility of the National Institute for Physiological Sciences.  
616 Rooms for cultivating *Marchantia* were provided by the Model Plant Research Facility, NIBB  
617 Bioresource Center. This work was supported by JSPS KAKENHI grants to K.Y. (19H04870), K.E.  
618 (19H04872), T.U. (19H05675 and 21H02515), N.M. (20K15824), T.N (15H04413 and 19K22448)  
619 and K.S. (18K06367).

620

#### 621 **Author contributions**

622 S.K. and K.Y. performed the computational analyses. N.M., K.E., and T.U. conducted the functional  
623 analyses in *Marchantia*. S.K., E.Y., and K.S. conducted the functional analyses in *Physcomitrella*. S.K.  
624 and T.N. performed sequence and phylogenetic analyses. All authors analyzed the data and  
625 participated in writing the manuscript.

626

#### 627 **Figure legends**

628 Fig. 1. *Mpblld10* mutants exhibit severe defects in spermatozoid formation. (A) Schematic structure of  
629 the *MpBLD10* (Mapoly0001s0460) gene. Nucleotide and amino acid sequences around mutation sites  
630 in wild-type (WT) and *Mpblld10-1* are aligned. The target and PAM sequences are indicated by  
631 underlining and bold font, respectively. (B-E) Maximum-intensity projection images of spermatozoids  
632 of wild type (B), *Mpblld10-1* (C and D), and *Mpblld10-2* (E) stained with Hoechst33342. Scale bars =  
633 10  $\mu\text{m}$  (F-I) Maximum-intensity projection images of spermatids immunostained with anti-centrin and  
634 anti-acetylated tubulin antibodies. Nuclei were visualized using Hoechst33342. Blue, green, and  
635 magenta pseudo colors indicate Hoechst33342, Alexa 488, and Alexa 594, respectively. Scale bars = 5  
636  $\mu\text{m}$ .

637

638 Fig. 2. Transmission electron microscopy (TEM) of spermatids and spermatozoids in wild type and  
639 *Mpblld10-1*. (A-H) TEM images in spermatids of wild type (A-D) and *Mpblld10-1* (E-H). Axonemes in  
640 flagella (A and E), multilayered structures (B and F), and basal bodies (C, D, G, and H) are shown. (I  
641 and J) TEM images of nuclei in spermatozoids of wild type (I) and *Mpblld10-1* (J). Scale bars = 200  
642 nm.

643

644 Fig. 3. Subcellular localization of the *MpBLD10* protein. (A-F) Differential interference contrast  
645 microscopy (DIC) and maximum-intensity projection images of spermatids and spermatozoids  
646 expressing mCitrine-*MpBLD10* (green) driven by its own promoter at stage 0 (A), stage 1 (B), stage 2  
647 (C), stage 3 (D), stage 4 (E), and stage 5 (F); nuclei were stained with Hoechst33342 (blue).  
648 Developmental stages were classified according to Minamino et al. (2021). (G) Maximum-intensity  
649 projection images of a spermatid expressing mCitrine-*MpBLD10* (green) immunostained with anti-  
650 centrin (magenta) and anti-acetylated tubulin (yellow) antibodies. The nucleus was stained with

651 Hoechst33342 (blue). Scale bars = 5  $\mu$ m.

652

653 Fig. 4. Comparisons of BLD10/CEP135 family protein sequences. (A) Phylogenetic tree of  
654 BLD10/CEP135 family proteins. Out-groups are Tetrahymena, human, and insects. Salmon, yellow,  
655 green, blue, purple, and gray background colors indicate gymnosperms, monilophytes, lycophytes,  
656 bryophytes, streptophyte algae, and chlorophytes, respectively. Branch lengths are proportional to the  
657 estimated number of amino acid substitutions/site (scale upper left). (B) Architecture of the  
658 MpBLD10 sequence (gaps removed) with conservation level among BLD10 proteins in the  
659 streptophytes in (A). Three conserved regions are indicated. Values of conservation levels were  
660 obtained using Jalview software.

661

662 Fig. 5. Existence of BLD10 proteins, flagella (basal body), and centriole during cell division in the  
663 plant species. Orange dots show presumed flagella loss. Groups indicated by gray color were not  
664 investigated due to insufficient sequence data. For phylogenetic relationships and presence of  
665 centrioles, refer to Puttick et al. (2018) and Buschmann and Zachgo (2016), respectively.

666

## 667 **References**

- 668 Altschul SF, Madden TL, Schäffer AA, Zhang J, Zhang Z, Miller W, Lipman DJ. 1997. Gapped  
669 BLAST and PSI-BLAST: a new generation of protein database search programs. *Nucleic Acids Res.*  
670 25:3389–3402.
- 671 Banks JA, Nishiyama T, Hasebe M, Bowman JL, Gribskov M, DePamphilis C, Albert VA, Aono N,  
672 Aoyama T, Ambrose BA, et al. 2011. The Selaginella genome identifies genetic changes associated  
673 with the evolution of vascular plants. *Science* 332:960–963.
- 674 Bayless BA, Giddings TH, Winey M, Pearson CG. 2012. Bld10/Cep135 stabilizes basal bodies to  
675 resist cilia-generated forces. *Mol. Biol. Cell* 23:4820–4832.
- 676 Bowman JL, Kohchi T, Yamato KT, Jenkins J, Shu S, Ishizaki K, Yamaoka S, Nishihama R,  
677 Nakamura Y, Berger F, et al. 2017. Insights into land plant evolution garnered from the *Marchantia*  
678 *polymorpha* genome. *Cell* 171:287-304.e15.
- 679 Brownfield L, Hafidh S, Durbarry A, Khatab H, Sidorova A, Doerner P, Twell D. 2009. *Arabidopsis*  
680 DUO POLLEN3 is a key regulator of male germline development and embryogenesis. *Plant Cell*  
681 21:1940–1956.
- 682 Buels R, Yao E, Diesh CM, Hayes RD, Munoz-Torres M, Helt G, Goodstein DM, Elsik CG, Lewis  
683 SE, Stein L, et al. 2016. JBrowse: a dynamic web platform for genome visualization and analysis.  
684 *Genome Biol.* 17:66.
- 685 Buschmann H, Zachgo S. 2016. The evolution of cell division: from streptophyte algae to land plants.  
686 *Trends Plant Sci.* 21:872–883.
- 687 Camacho C, Coulouris G, Avagyan V, Ma N, Papadopoulos J, Bealer K, Madden TL. 2009. BLAST+:

- 688 architecture and applications. *BMC Bioinformatics* 10:421.
- 689 Carothers ZB, Duckett JG. 1980. The bryophyte spermatozoid: a source of new phylogenetic  
690 information. *Bull. Torrey Bot. Club* 107:281.
- 691 Carothers ZB, Kreitner GL. 1968. Studies of spermatogenesis in the Hepaticae. II. Blepharoplast  
692 structure in the spermatid of *Marchantia*. *J. Cell Biol.* 36:603–616.
- 693 Carvalho-Santos Z, Machado P, Branco P, Tavares-cadete F, Rodrigues-martins A, Pereira-leal JB,  
694 Bettencourt-dias M. 2010. Stepwise evolution of the centriole-assembly pathway. *J. Cell Sci.*  
695 123:1414–1426.
- 696 Chiyoda S, Ishizaki K, Kataoka H, Yamato KT, Kohchi T. 2008. Direct transformation of the liverwort  
697 *Marchantia polymorpha* L. by particle bombardment using immature thalli developing from spores.  
698 *Plant Cell Rep.* 27:1467–1473.
- 699 Collonnier C, Guyon-Debast A, Maclot F, Mara K, Charlot F, Nogu e F. 2017. Towards mastering  
700 CRISPR-induced gene knock-in in plants: survey of key features and focus on the model  
701 *Physcomitrella patens*. *Methods* 121–122:103–117.
- 702 Danecek P, Bonfield JK, Liddle J, Marshall J, Ohan V, Pollard MO, Whitwham A, Keane T, McCarthy  
703 SA, Davies RM, et al. 2021. Twelve years of SAMtools and BCFtools. *Gigascience* 10:giab008.
- 704 Emms DM, Kelly S. 2019. OrthoFinder: phylogenetic orthology inference for comparative genomics.  
705 *Genome Biol.* 20:238.
- 706 Glastad KM, Hunt BG, Yi S V., Goodisman MAD. 2011. DNA methylation in insects: on the brink of  
707 the epigenomic era. *Insect Mol. Biol.* 20:553–565.
- 708 Gluck-Thaler E, Cerutti A, Perez-Quintero AL, Butchacas J, Roman-Reyna V, Madhavan VN,  
709 Shantharaj D, Merfa M V., Pesce C, Jauneau A, et al. 2020. Repeated gain and loss of a single gene  
710 modulates the evolution of vascular plant pathogen lifestyles. *Sci. Adv.* 6:4516–4529.
- 711 Graham LE, McBride GE. 1979. The occurrence and phylogenetic significance of a multilayered  
712 structure in coleochaete spermatozoids. *Am. J. Bot.* 66:887-894.
- 713 Griesmann M, Chang Y, Liu X, Song Y, Haberer G, Crook MB, Billault-Penneteau B, Laressergues  
714 D, Keller J, Imanishi L, et al. 2018. Phylogenomics reveals multiple losses of nitrogen-fixing root  
715 nodule symbiosis. *Science* 361:eaat1743.
- 716 Gu N, Tamada Y, Imai A, Palfalvi G, Kabeya Y, Shigenobu S, Ishikawa M, Angelis KJ, Chen C,  
717 Hasebe M. 2020. DNA damage triggers reprogramming of differentiated cells into stem cells in  
718 *Physcomitrella*. *Nat. Plants* 6:1098–1105.
- 719 Higo A, Kawashima T, Borg M, Zhao M, L opez-vidriero I, Sakayama H, Montgomery SA, Sekimoto  
720 H, Hackenberg D, Shimamura M, et al. 2018. Transcription factor DUO1 generated by neo-  
721 functionalization is associated with evolution of sperm differentiation in plants. *Nat. Commun.* 9:1–  
722 13.
- 723 Higo A, Niwa M, Yamato KT, Yamada L, Sawada H, Sakamoto T, Kurata T, Shirakawa M, Endo M,  
724 Shigenobu S, et al. 2016. Transcriptional framework of male gametogenesis in the liverwort

- 725 *Marchantia polymorpha* L. *Plant Cell Physiol.* 57:325–338.
- 726 Hiraki M, Nakazawa Y, Kamiya R. 2007. Report Bld10p constitutes the cartwheel-spoke tip and  
727 stabilizes the 9-fold symmetry of the centriole. *Curr. Biol.* 17:1778–1783.
- 728 Hodges ME, Wickstead B, Gull K, Langdale JA. 2012. The evolution of land plant cilia. *New Phytol.*  
729 195:526–540.
- 730 Hotta T, Kong Z, Ho CMK, Zeng CJT, Horio T, Fong S, Vuong T, Lee YRJ, Liu B. 2012.  
731 Characterization of the *Arabidopsis* augmin complex uncovers its critical function in the assembly of  
732 the acentrosomal spindle and phragmoplast microtubule arrays. *Plant Cell* 24:1494–1509.
- 733 Ishizaki K, Chiyoda S, Yamato KT, Kohchi T. 2008. Agrobacterium-mediated transformation of the  
734 haploid liverwort *Marchantia polymorpha* L., an emerging model for plant biology. *Plant Cell*  
735 *Physiol.* 49:1084–1091.
- 736 Ishizaki K, Nishihama R, Ueda M, Inoue K, Ishida S, Nishimura Y, Shikanai T, Kohchi T. 2015.  
737 Development of gateway binary vector series with four different selection markers for the liverwort  
738 *Marchantia polymorpha*. *PLoS One* 10:e0138876.
- 739 Jones DT, Taylor WR, Thornton JM. 1992. The rapid generation of mutation data matrices from  
740 protein sequences. *Bioinformatics* 8:275–282.
- 741 Katoh K, Standley DM. 2013. MAFFT multiple sequence alignment software version 7:  
742 improvements in performance and usability. *Mol. Biol. Evol.* 30:772–780.
- 743 Kim D, Paggi JM, Park C, Bennett C, Salzberg SL. 2019. Graph-based genome alignment and  
744 genotyping with HISAT2 and HISAT-genotype. *Nat. Biotechnol.* 37:907–915.
- 745 Kleylein-Sohn J, Westendorf J, Clech M Le, Habedanck R, Stierhof Y, Nigg EA. 2007. Plk4-Induced  
746 centriole biogenesis in human cells. *Dev. Cell* 13:190–202.
- 747 Koshimizu S, Kofuji R, Sasaki-Sekimoto Y, Kikkawa M, Shimojima M, Ohta H, Shigenobu S,  
748 Kabeya Y, Hiwatashi Y, Tamada Y, et al. 2018. *Physcomitrella* MADS-box genes regulate water  
749 supply and sperm movement for fertilization. *Nat. Plants* 4:36–45.
- 750 Kreitner GL, Carothers ZB. 1976. Studies of spermatogenesis in the hepaticae V. Blepharoplast  
751 development in *Marchantia polymorpha*. *Am. J. Bot.* 63:545.
- 752 Kubota A, Ishizaki K, Hosaka M, Kohchi T. 2013. Efficient Agrobacterium-mediated transformation  
753 of the liverwort *Marchantia polymorpha* using regenerating thalli. *Biosci. Biotechnol. Biochem.*  
754 77:167–172.
- 755 Kumar S, Stecher G, Li M, Knyaz C, Tamura K. 2018. MEGA X: molecular evolutionary genetics  
756 analysis across computing platforms. *Mol. Biol. Evol.* 35:1547–1549.
- 757 Larkin A, Marygold SJ, Antonazzo G, Attrill H, dos Santos G, Garapati P V., Goodman JL, Sian  
758 Gramates L, Millburn G, Strelets VB, et al. 2021. FlyBase: updates to the *Drosophila melanogaster*  
759 knowledge base. *Nucleic Acids Res.* 49:D899–D907.
- 760 Leebens-Mack JH, Barker MS, Carpenter EJ, Deyholos MK, Gitzendanner MA, Graham SW, Grosse  
761 I, Li Z, Melkonian M, Mirarab S, et al. 2019. One thousand plant transcriptomes and the

- 762 phylogenomics of green plants. *Nature* 574:679–685.
- 763 Leinonen R, Sugawara H, Shumway M. 2011. The Sequence Read Archive. *Nucleic Acids Res.*  
764 39:D19–D21.
- 765 Li FW, Brouwer P, Carretero-Paulet L, Cheng S, De Vries J, Delaux PM, Eily A, Koppers N, Kuo LY,  
766 Li Z, et al. 2018. Fern genomes elucidate land plant evolution and cyanobacterial symbioses. *Nat.*  
767 *Plants* 4:460–472.
- 768 Li FW, Nishiyama T, Waller M, Frangedakis E, Keller J, Li Z, Fernandez-Pozo N, Barker MS,  
769 Bennett T, Blázquez MA, et al. 2020. *Anthoceros* genomes illuminate the origin of land plants and the  
770 unique biology of hornworts. *Nat. Plants* 6:259–272.
- 771 Lin JJ, Wang FY, Li WH, Wang TY. 2017. The rises and falls of opsin genes in 59 ray-finned fish  
772 genomes and their implications for environmental adaptation. *Sci. Rep.* 7:1–13.
- 773 Lin YC, Chang C, Hsu W, Tang CC, Lin Yi-nan, Chou E, Wu C, Tang TK. 2013. Human  
774 microcephaly protein CEP135 binds to hSAS-6 and CPAP, and is required for centriole assembly.  
775 *EMBO J.* 32:1141–1154.
- 776 Livingstone CD, Barton GJ. 1993. Protein sequence alignments: a strategy for the hierarchical  
777 analysis of residue conservation. *Bioinformatics* 9:745–756.
- 778 Lu S, Wang J, Chitsaz F, Derbyshire MK, Geer RC, Gonzales NR, Gwadz M, Hurwitz DI, Marchler  
779 GH, Song JS, et al. 2020. CDD/SPARCLE: the conserved domain database in 2020. *Nucleic Acids*  
780 *Res.* 48:D265–D268.
- 781 Matsuura K, Lefebvre PA, Kamiya R, Hirono M. 2004. Bld10p, a novel protein essential for basal  
782 body assembly in *Chlamydomonas*: localization to the cartwheel, the first ninefold symmetrical  
783 structure appearing during assembly. *J. Cell Biol.* 165:663–671.
- 784 Minamino N, Norizuki T, Mano S, Ebine K, Ueda T. 2021. Remodeling of organelles and  
785 microtubules during spermiogenesis in the liverwort *Marchantia polymorpha*.  
786 bioRxiv:2021.07.10.451882
- 787 Mottier-Pavie V, Megraw TL. 2009. *Drosophila* Bld10 is a centriolar protein that regulates centriole,  
788 basal body, and motile cilium assembly. *Mol. Biol. Cell* 20:2605–2614.
- 789 Naito Y, Hino K, Bono H, Ui-Tei K. 2015. CRISPRdirect: software for designing CRISPR/Cas guide  
790 RNA with reduced off-target sites. *Bioinformatics* 31:1120–1123.
- 791 NCBI Resource Coordinators. 2018. Database resources of the National Center for Biotechnology  
792 Information. *Nucleic Acids Res.* 46:D8–D13.
- 793 Nishiyama T, Hiwatashi Y, Sakakibara K, Kato M, Hasebe M. 2000. Tagged mutagenesis and gene-  
794 trap in the moss, *Physcomitrella patens* by shuttle mutagenesis. *DNA Res.* 7:9–18.
- 795 Nishiyama T, Sakayama H, de Vries J, Buschmann H, Saint-Marcoux D, Ullrich KK, Haas FB,  
796 Vanderstraeten L, Becker D, Lang D, et al. 2018. The *Chara* genome: secondary complexity and  
797 implications for plant terrestrialization. *Cell* 174:448–464.e24.
- 798 Norstog K. 1967. Fine structure of the spermatozoid of *Zamia* with special reference to the flagellar

- 799 apparatus. *Am. J. Bot.* 54:831.
- 800 Puttick MN, Morris JL, Williams TA, Cox CJ, Edwards D, Kenrick P, Pressel S, Wellman CH,  
801 Schneider H, Pisani D, et al. 2018. The interrelationships of land plants and the nature of the ancestral  
802 embryophyte. *Curr. Biol.* 28:733-745.e2.
- 803 Rensing SA, Goffinet B, Meyberg R, Wu SZ, Bezanilla M. 2020. The moss *Physcomitrium*  
804 (*Physcomitrella*) *patens*: a model organism for non-seed plants. *Plant Cell* 32:1361–1376.
- 805 Rensing SA, Lang D, Zimmer AD, Terry A, Salamov A, Shapiro H, Nishiyama T, Perroud P-F,  
806 Lindquist EA, Kamisugi Y, et al. 2008. The *Physcomitrella* genome reveals evolutionary insights into  
807 the conquest of land by plants. *Science* 319:64–69.
- 808 Renzaglia KS, Carothers ZB, Duckett JG. 1985. Comparative ultrastructural studies of  
809 spermatogenesis in the Metzgeriales (Hepaticae). I. The blepharoplast of *Pallavicinia lyellii*. *Am. J.*  
810 *Bot.* 72:588–595.
- 811 Renzaglia KS, Duckett JG. 1987. Spermatogenesis in *Blasia pusilla* : from young antheridium through  
812 mature spermatozoid. *Bryologist* 90:419–449.
- 813 Renzaglia KS, Garbary DJ. 2001. Motile gametes of land plants: diversity, development, and  
814 evolution. *CRC. Crit. Rev. Plant Sci.* 20:107–213.
- 815 Sakakibara K, Nishiyama T, Deguchi H, Hasebe M. 2008. Class 1 KNOX genes are not involved in  
816 shoot development in the moss *Physcomitrella patens* but do function in sporophyte development.  
817 *Evol. Dev.* 10:555–566.
- 818 Schaefer DG, Delacote F, Charlot F, Vrielynck N, Guyon-Debast A, Le Guin S, Neuhaus JM,  
819 Doutriaux MP, Nogué F. 2010. RAD51 loss of function abolishes gene targeting and de-represses  
820 illegitimate integration in the moss *Physcomitrella patens*. *DNA Repair (Amst).* 9:526–533.
- 821 Schaefer DG, Zryd JP. 1997. Efficient gene targeting in the moss *Physcomitrella patens*. *Plant J.*  
822 11:1195–1206.
- 823 Sharma V, Hecker N, Roscito JG, Foerster L, Langer BE, Hiller M. 2018. A genomics approach  
824 reveals insights into the importance of gene losses for mammalian adaptations. *Nat. Commun.* 9:1–9.
- 825 Shimamura M, Brown RC, Lemmon BE, Akashi T, Mizuno K, Nishihara N, Tomizawa KI, Yoshimoto  
826 K, Deguchi H, Hosoya H, et al. 2004.  $\gamma$ -tubulin in basal land plants: characterization, localization, and  
827 implication in the evolution of acentriolar microtubule organizing centers. *Plant Cell* 16:45–59.
- 828 Simpson MG. 2018. Evolution and diversity of green and land plants. In: *Plant systematics* (3rd  
829 edition). Amsterdam: Elsevier Science. pp. 55–74.
- 830 Spratt NT. 1971. *Developmental biology*. Belmont: Wadsworth Publishing Company
- 831 Stover NA, Krieger CJ, Binkley G, Dong Q, Fisk DG, Nash R, Sethuraman A, Weng S, Cherry JM.  
832 2006. Tetrahymena Genome Database (TGD): a new genomic resource for *Tetrahymena thermophila*  
833 research. *Nucleic Acids Res.* 34:D500–D503.
- 834 Sugano SS, Nishihama R, Shirakawa M, Takagi J, Matsuda Y, Ishida S, Shimada T, Hara-Nishimura I,  
835 Osakabe K, Kohchi T. 2018. Efficient CRISPR/Cas9-based genome editing and its application to

836 conditional genetic analysis in *Marchantia polymorpha*. *PLoS One* 13:e0205117.

837 Tajima F. 1993. Simple methods for testing the molecular evolutionary clock hypothesis. *Genetics*

838 135:599–607.

839 Vaughn KC, Renzaglia KS. 1998. Origin of bicentrioles in Anthocerotale spermatogenous cells. In:

840 *Bryology for the Twenty-first Century*. London: Routledge. pp. 189–203.

841 Wang S, Li L, Li H, Sahu SK, Wang H, Xu Y, Xian W, Song B, Liang H, Cheng S, et al. 2020.

842 Genomes of early-diverging streptophyte algae shed light on plant terrestrialization. *Nat. Plants* 6:95–

843 106.

844 Waterhouse AM, Procter JB, Martin DMA, Clamp M, Barton GJ. 2009. Jalview version 2-A multiple

845 sequence alignment editor and analysis workbench. *Bioinformatics* 25:1189–1191.

846 Wickett NJ, Mirarab S, Nguyen N, Warnow T, Carpenter E, Matasci N, Ayyampalayam S, Barker MS,

847 Burleigh JG, Gitzendanner MA, et al. 2014. Phylotranscriptomic analysis of the origin and early

848 diversification of land plants. *Proc. Natl. Acad. Sci. USA*. 111:E4859–E4868.

849 Wingfield J, Lechtreck K-F. 2018. *Chlamydomonas* basal bodies as flagella organizing centers. *Cells*

850 7:79.

851 Yang Z. 2007. PAML 4: Phylogenetic analysis by maximum likelihood. *Mol. Biol. Evol.* 24:1586–

852 1591.

853 Yates AD, Achuthan P, Akanni W, Allen James, Allen Jamie, Alvarez-Jarreta J, Amode MR, Armean

854 IM, Azov AG, Bennett R, et al. 2020. Ensembl 2020. *Nucleic Acids Res.* 48:D682–D688.

855 Zhang R, Guo C, Zhang W, Wang P, Li L, Duan X, Du Q, Zhao L, Shan H, Hodges SA, et al. 2013.

856 Disruption of the petal identity gene APETALA3-3 is highly correlated with loss of petals within the

857 buttercup family (Ranunculaceae). *Proc. Natl. Acad. Sci. USA*. 110:5074–5079.

858 Zhao YP, Fan G, Yin PP, Sun S, Li N, Hong X, Hu G, Zhang H, Zhang FM, Han JD, et al. 2019.

859 Resequencing 545 ginkgo genomes across the world reveals the evolutionary history of the living

860 fossil. *Nat. Commun.* 10:1–10.

861



A *MpBLD10*: Mapoly0001s0460

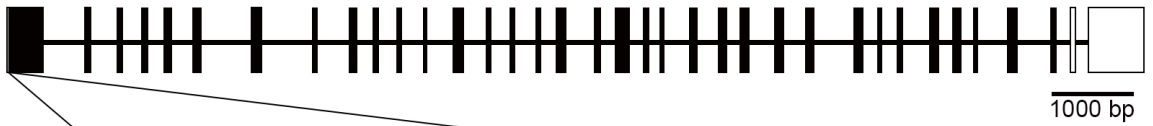

WT <R><V><K><V><A><A><L><T><D><S><L><K>  
 CGAGTCAAAGTTGCAGCCCTCACGGACAGTCTGAAG  
*Mpblid10-1* CGAGTCAAAGTTGCAGCCC-CACGGACAGTCTGAAG  
 <R><V><K><V><A><A>< P><R><T><V><\*>

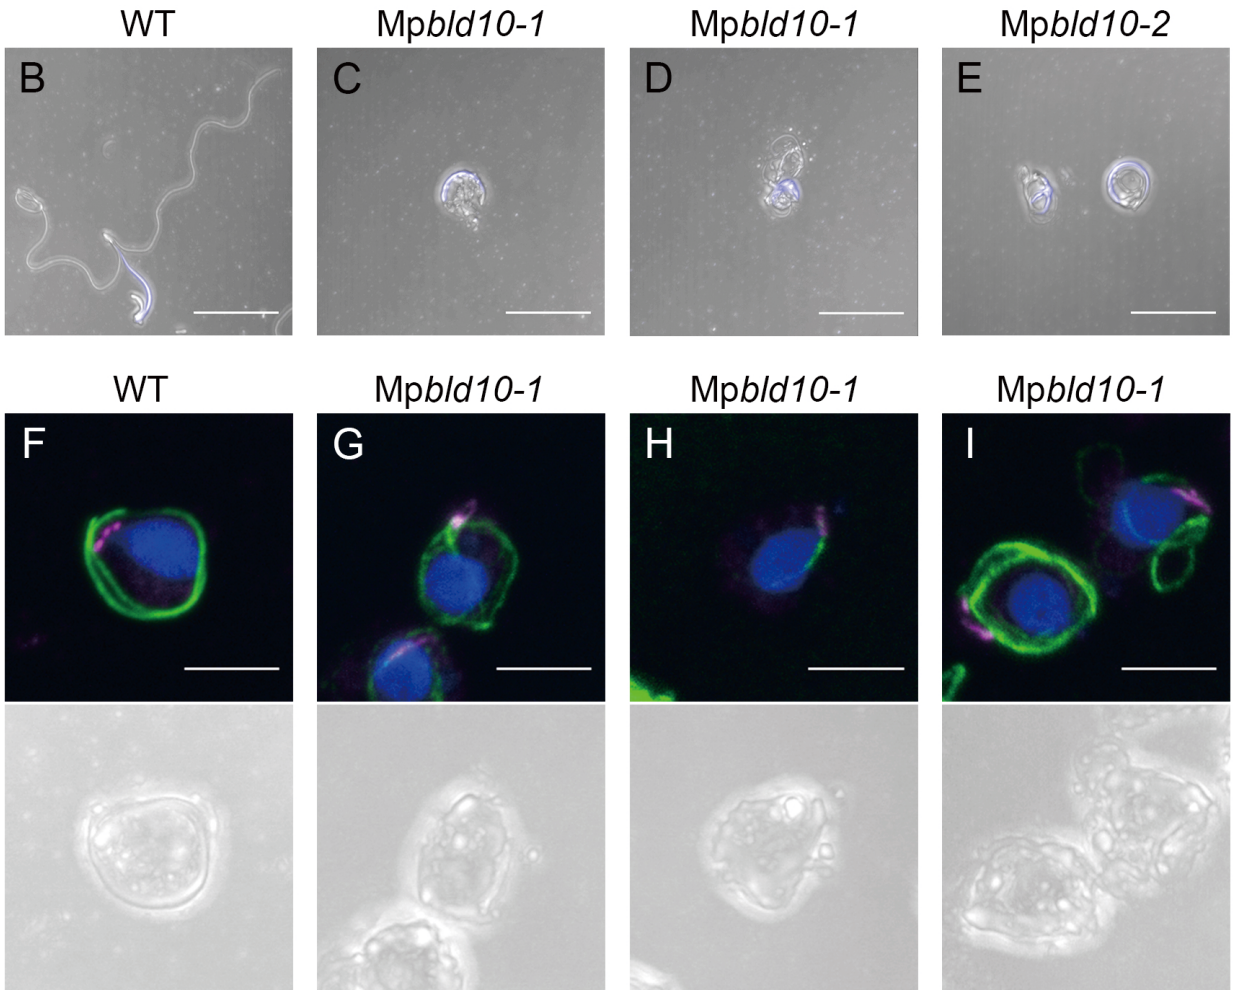

Fig. 1. *Mpblid10* mutants exhibit severe defects in spermatozoid formation.

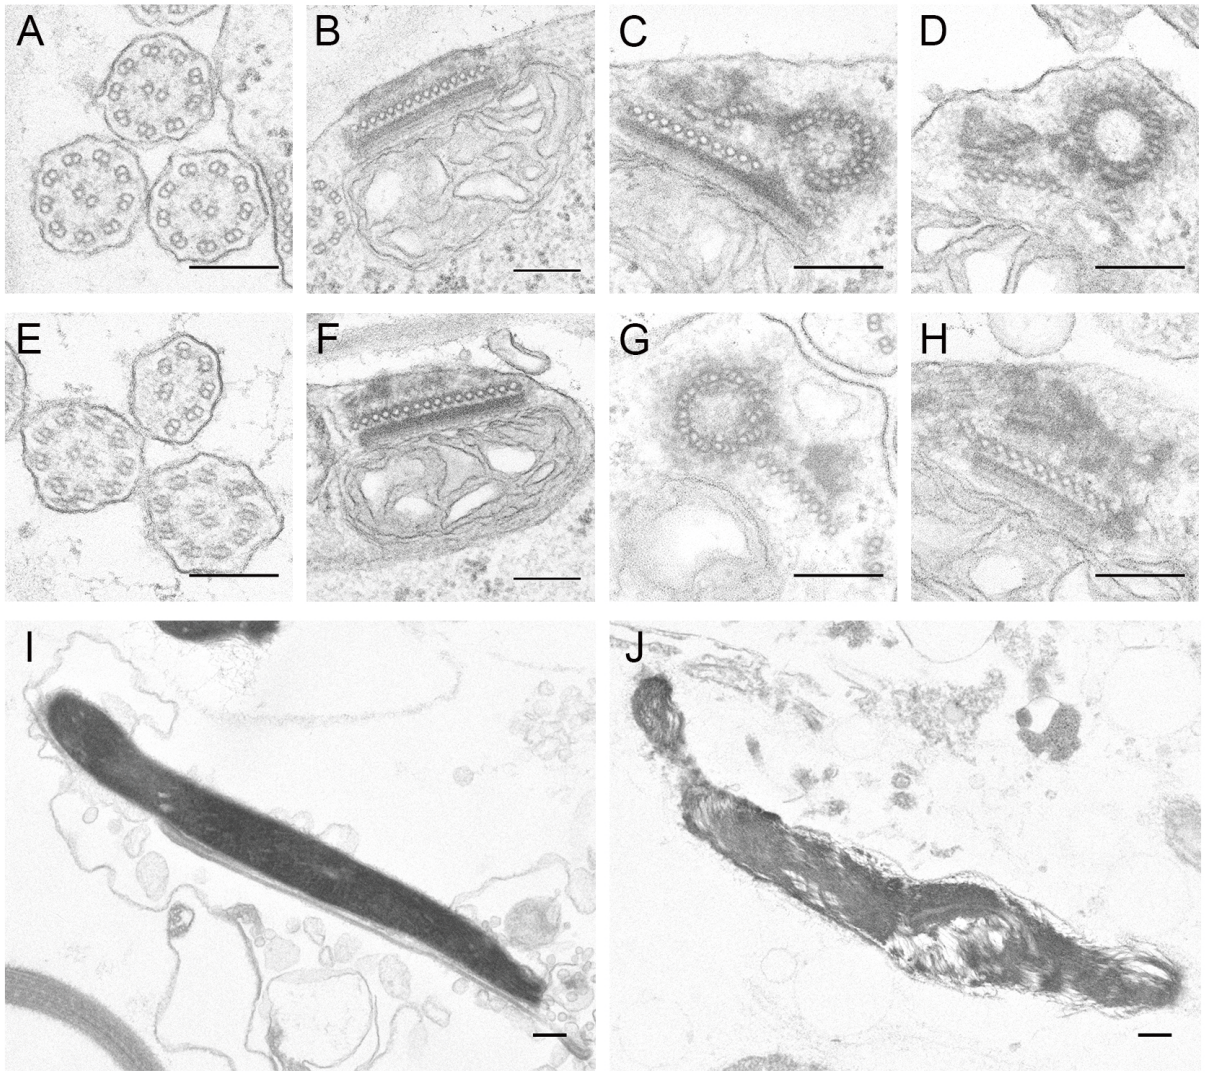

Fig. 2. Transmission electron microscopy (TEM) of spermatids and spermatozoa in wild type and *Mpbld10-1*.

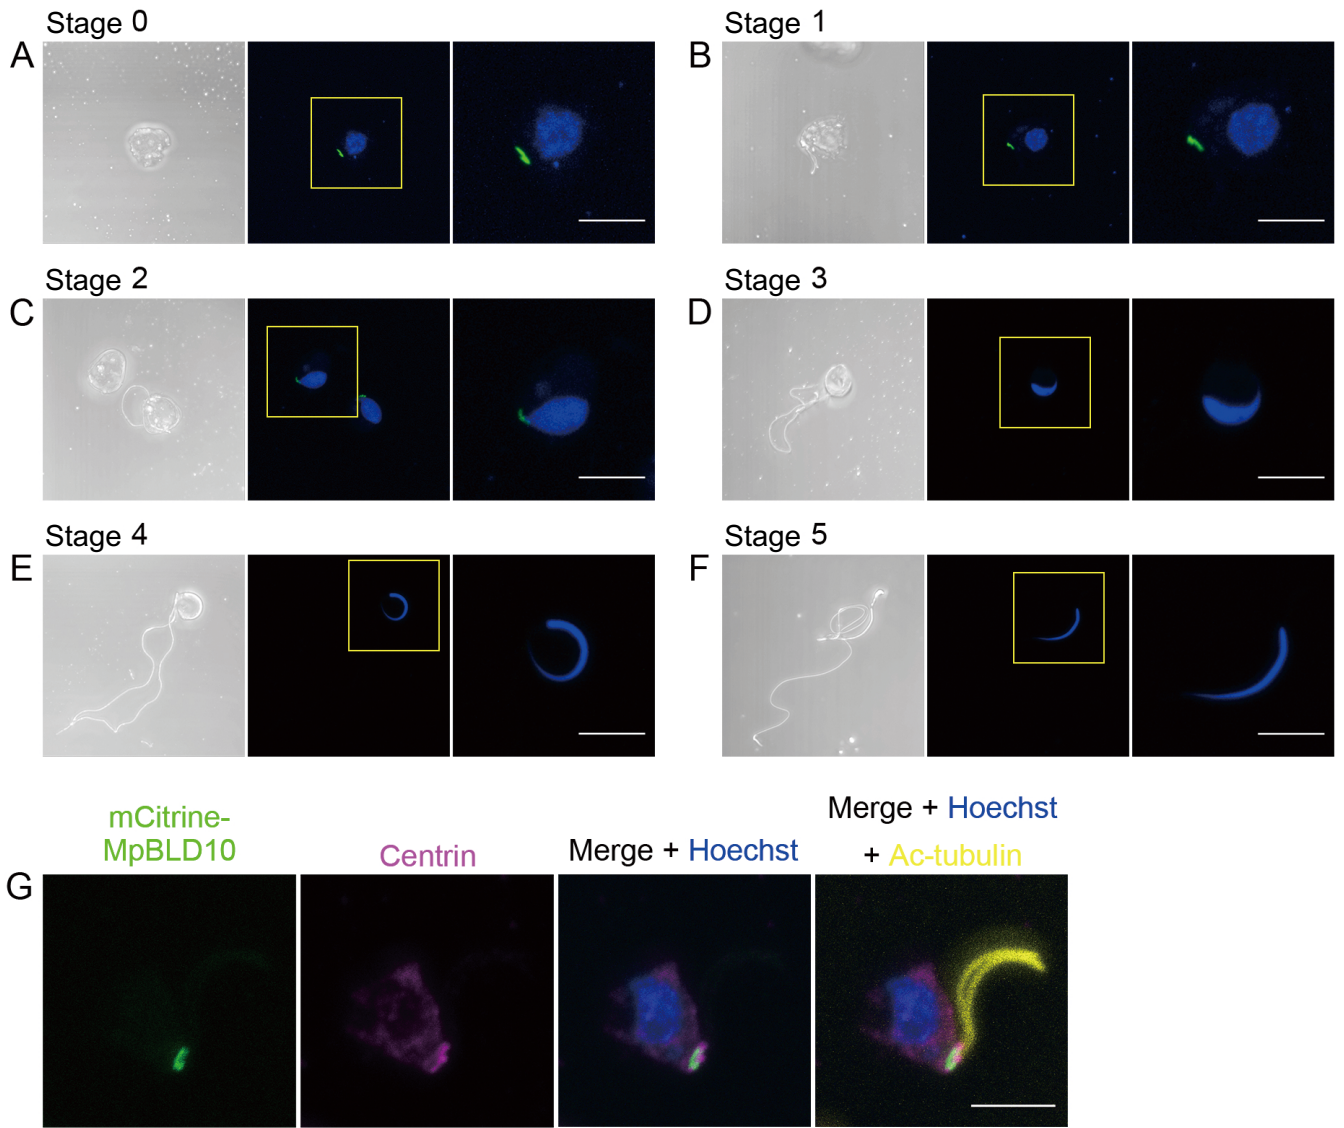

Fig 3. Subcellular localization of the MpBLD10 protein.

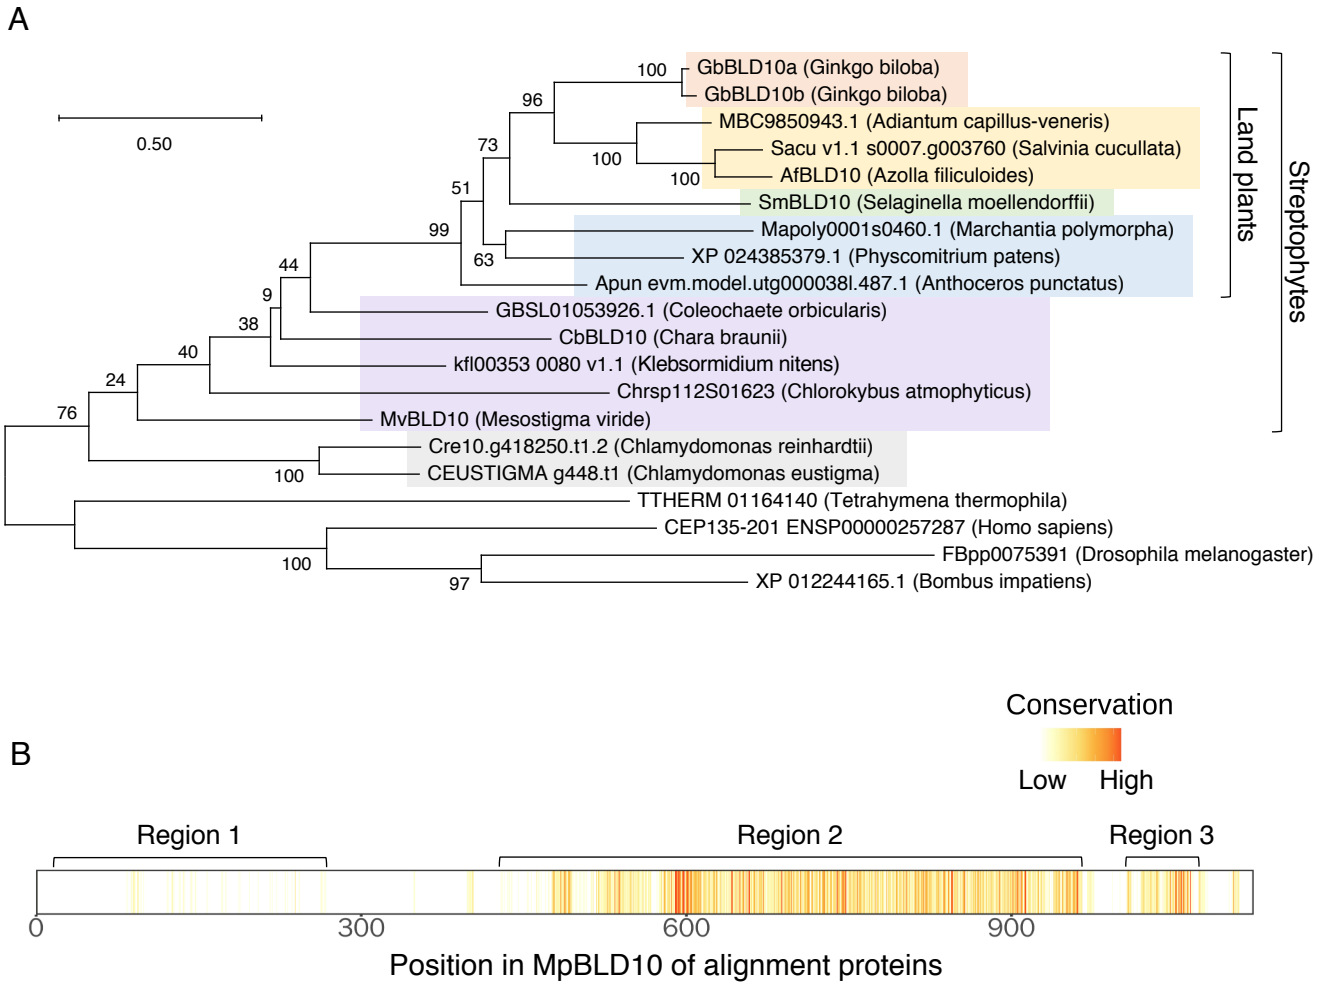

Fig. 4. Sequence comparisons of BLD10/CEP135 family proteins.

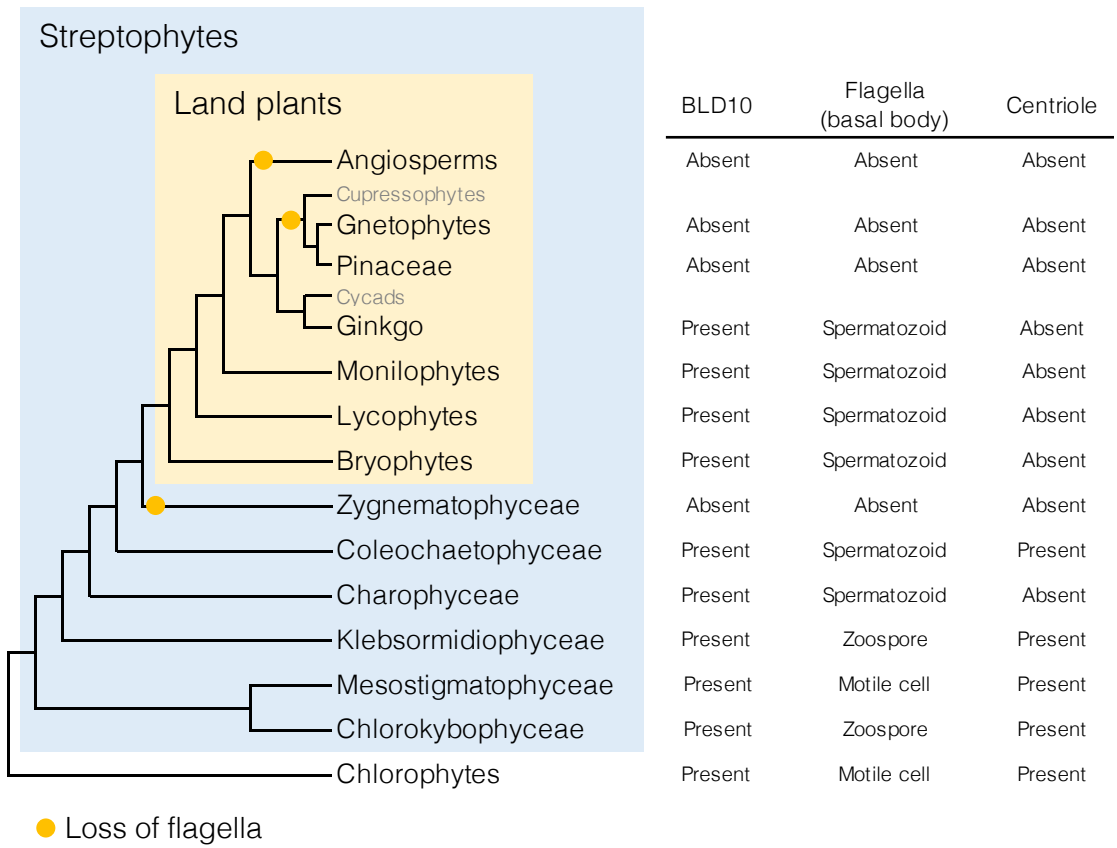

Fig. 5. Existence of BLD10 proteins, flagella, and basal body/centriole in the plant species.
